# Supplementary material for: Molecular Structures and Intermolecular Hydrogen Bonding of Silylated 2-Aminopyrimidines
Source: MDPI journal article supplement (doi:10.3390/cryst13070990), 2023-06-21
Supplement: s1 [file s1]

## Supporting Information:

# Molecular Structures and Intermolecular Hydrogen Bonding of Silylated 2-Aminopyrimidines

5 Marcus Herbig\*, Edwin Kroke, Jörg Wagler\*

*Institut für Anorganische Chemie, TU Bergakademie Freiberg, Leipziger Str. 29, 09599 Freiberg, Germany.*

\* Corresponding authors. E-mail addresses: marcus.herbig@chemie.tu-freiberg.de, joerg.wagler@chemie.tu-freiberg.de

1 Details of chemicals used and purification methods applied

10 2 NMR spectra and details of data acquisition

3 Raman spectra

**Table S1:** Details of chemicals used and purification methods applied

| <i>substance</i>                      | <i>Source</i>           | <i>purification</i>                                                                                                                          |
|---------------------------------------|-------------------------|----------------------------------------------------------------------------------------------------------------------------------------------|
| Anisole                               | VWR (AnalaR Normapuram) | Distillation from Na/benzophenone                                                                                                            |
| Diethyl ether                         | VWR (AnalaR Normapuram) | MBRAUN MB-SPS-800                                                                                                                            |
| Tetrahydrofuran                       | VWR (AnalaR Normapuram) | MBRAUN MB-SPS-800                                                                                                                            |
| Tetrahydrofuran-d8                    | Deutero, 99.5 %         | none                                                                                                                                         |
| <i>n</i> -Pentane                     | VWR TECHNICAL           | standing several days over activated molecular sieve (type 3 Å, purchased from Sigma-Aldrich)                                                |
| Triethylamine                         | AppliChem (pure)        | Distillation from Na/benzophenon                                                                                                             |
| Deuterated Chloroform                 | Deutero                 | Distillation from CaH <sub>2</sub>                                                                                                           |
| Chloroform (stabilized with amylenes) | Fisher Scientific       | standing several days over activated molecular sieve (type 3 Å, purchased from Sigma-Aldrich) and activated alumina (purchased from Supelco) |
| Chlorotrimethylsilane                 | Sigma-Aldrich           | Distillation over 20 cm filled column                                                                                                        |
| Dichlorodimethylsilane                | Sigma-Aldrich           | Distillation over 20 cm filled column                                                                                                        |
| Trichloromethylsilane                 | Sigma-Aldrich           | Distillation over 20 cm filled column                                                                                                        |
| Tetrachlorsilane                      | Sigma-Aldrich           | Distillation over 20 cm filled column                                                                                                        |
| 2-Aminopyrimidine                     | Sigma-Aldrich (97 %)    | none                                                                                                                                         |
| CO <sub>2</sub> (gaseous)             | Linde, purity '5.3'     | Passed through a column with molecular sieves 3 Å prior to use                                                                               |

## 2 NMR spectra

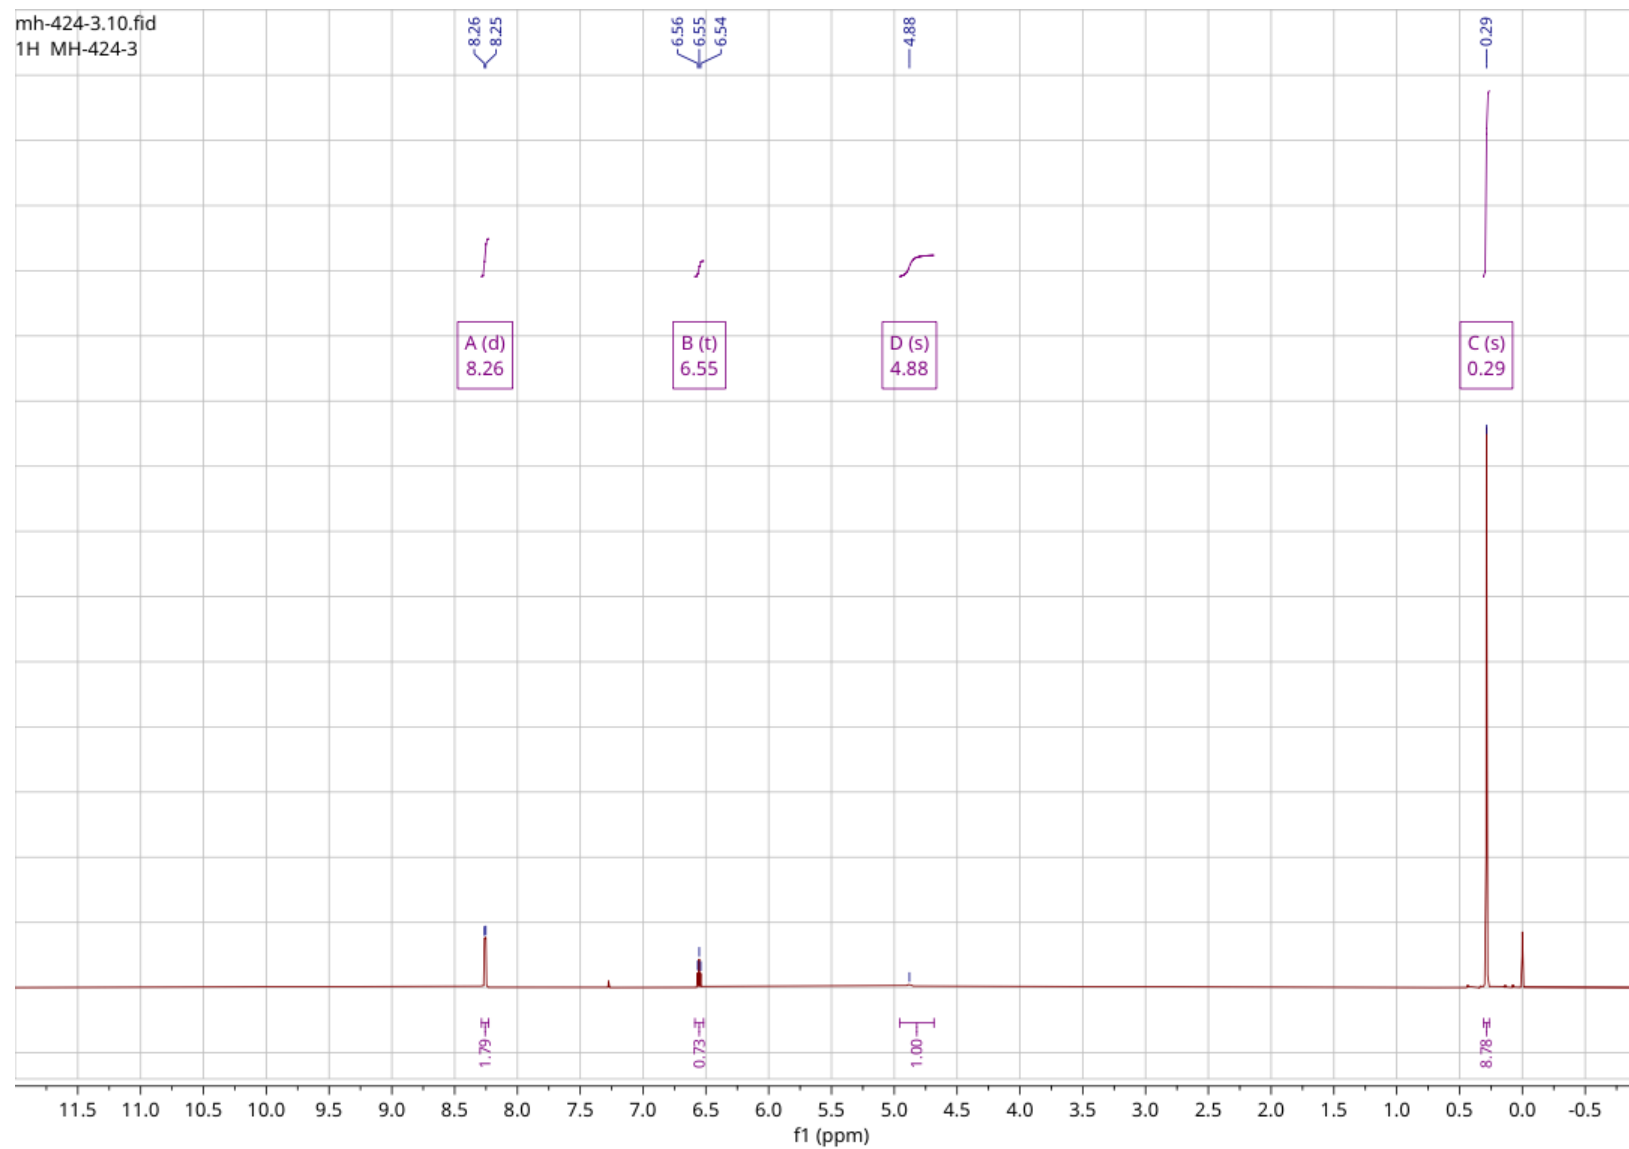

**Figure S1:**  $^1\text{H}$  NMR spectrum of **1** (in  $\text{CDCl}_3$ , with  $\text{SiMe}_4$  as internal shift reference).

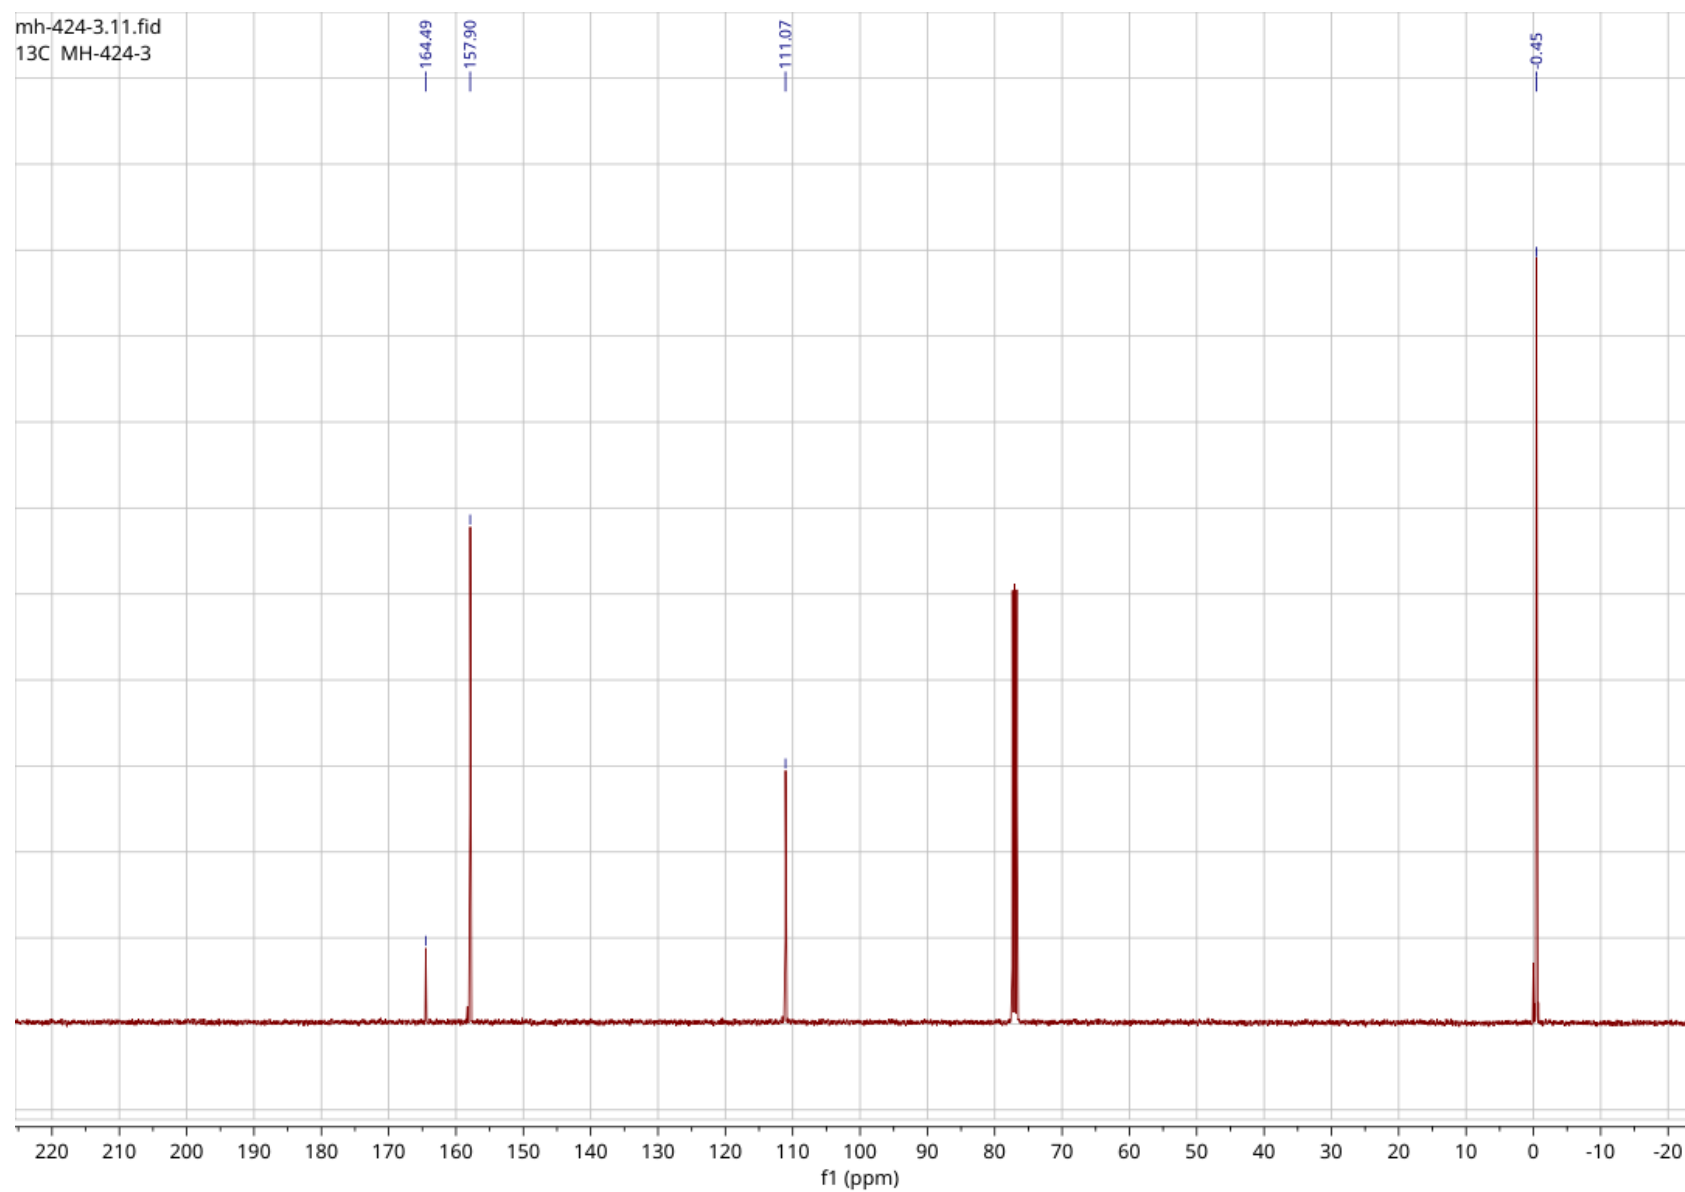

**Figure S2:**  $^{13}\text{C}\{^1\text{H}\}$  NMR spectrum of **1** (in  $\text{CDCl}_3$ , with  $\text{SiMe}_4$  as internal shift reference).

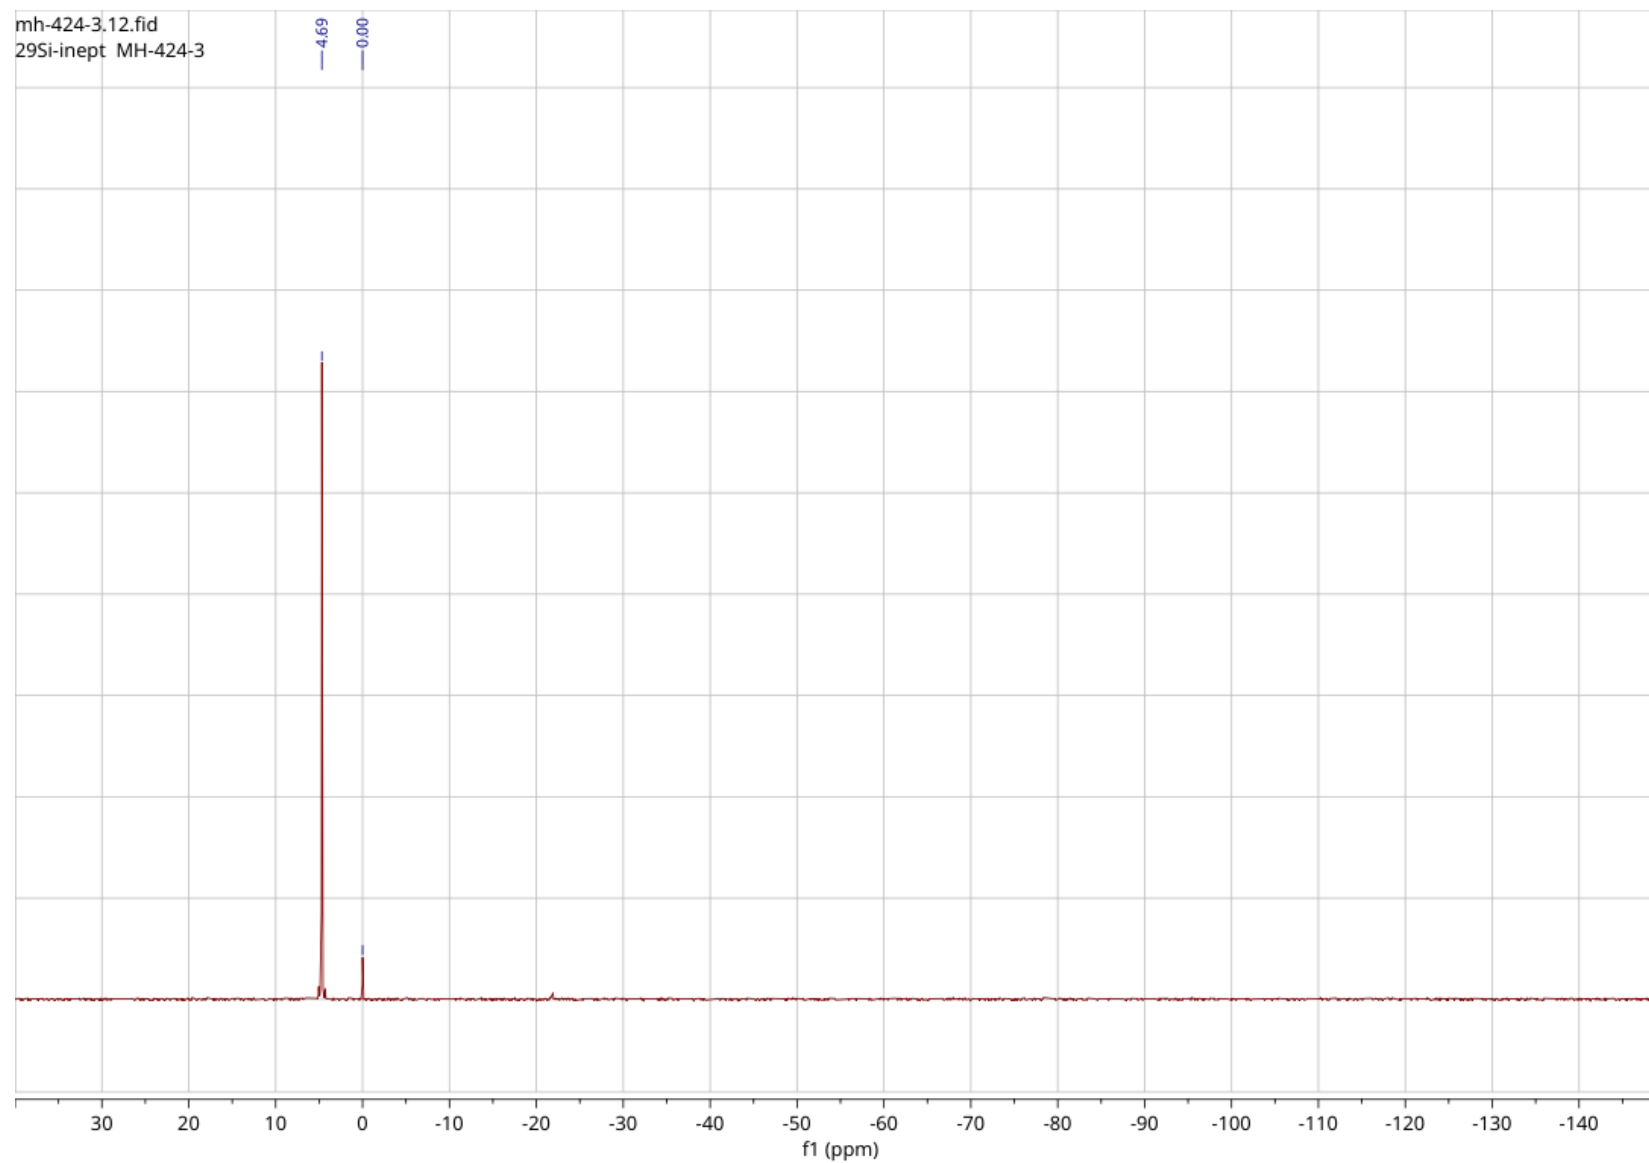

20 **Figure S3:**  $^{29}\text{Si}\{^1\text{H}\}$  INEPT NMR spectrum of **1** (in  $\text{CDCl}_3$ , with  $\text{SiMe}_4$  as internal shift reference).

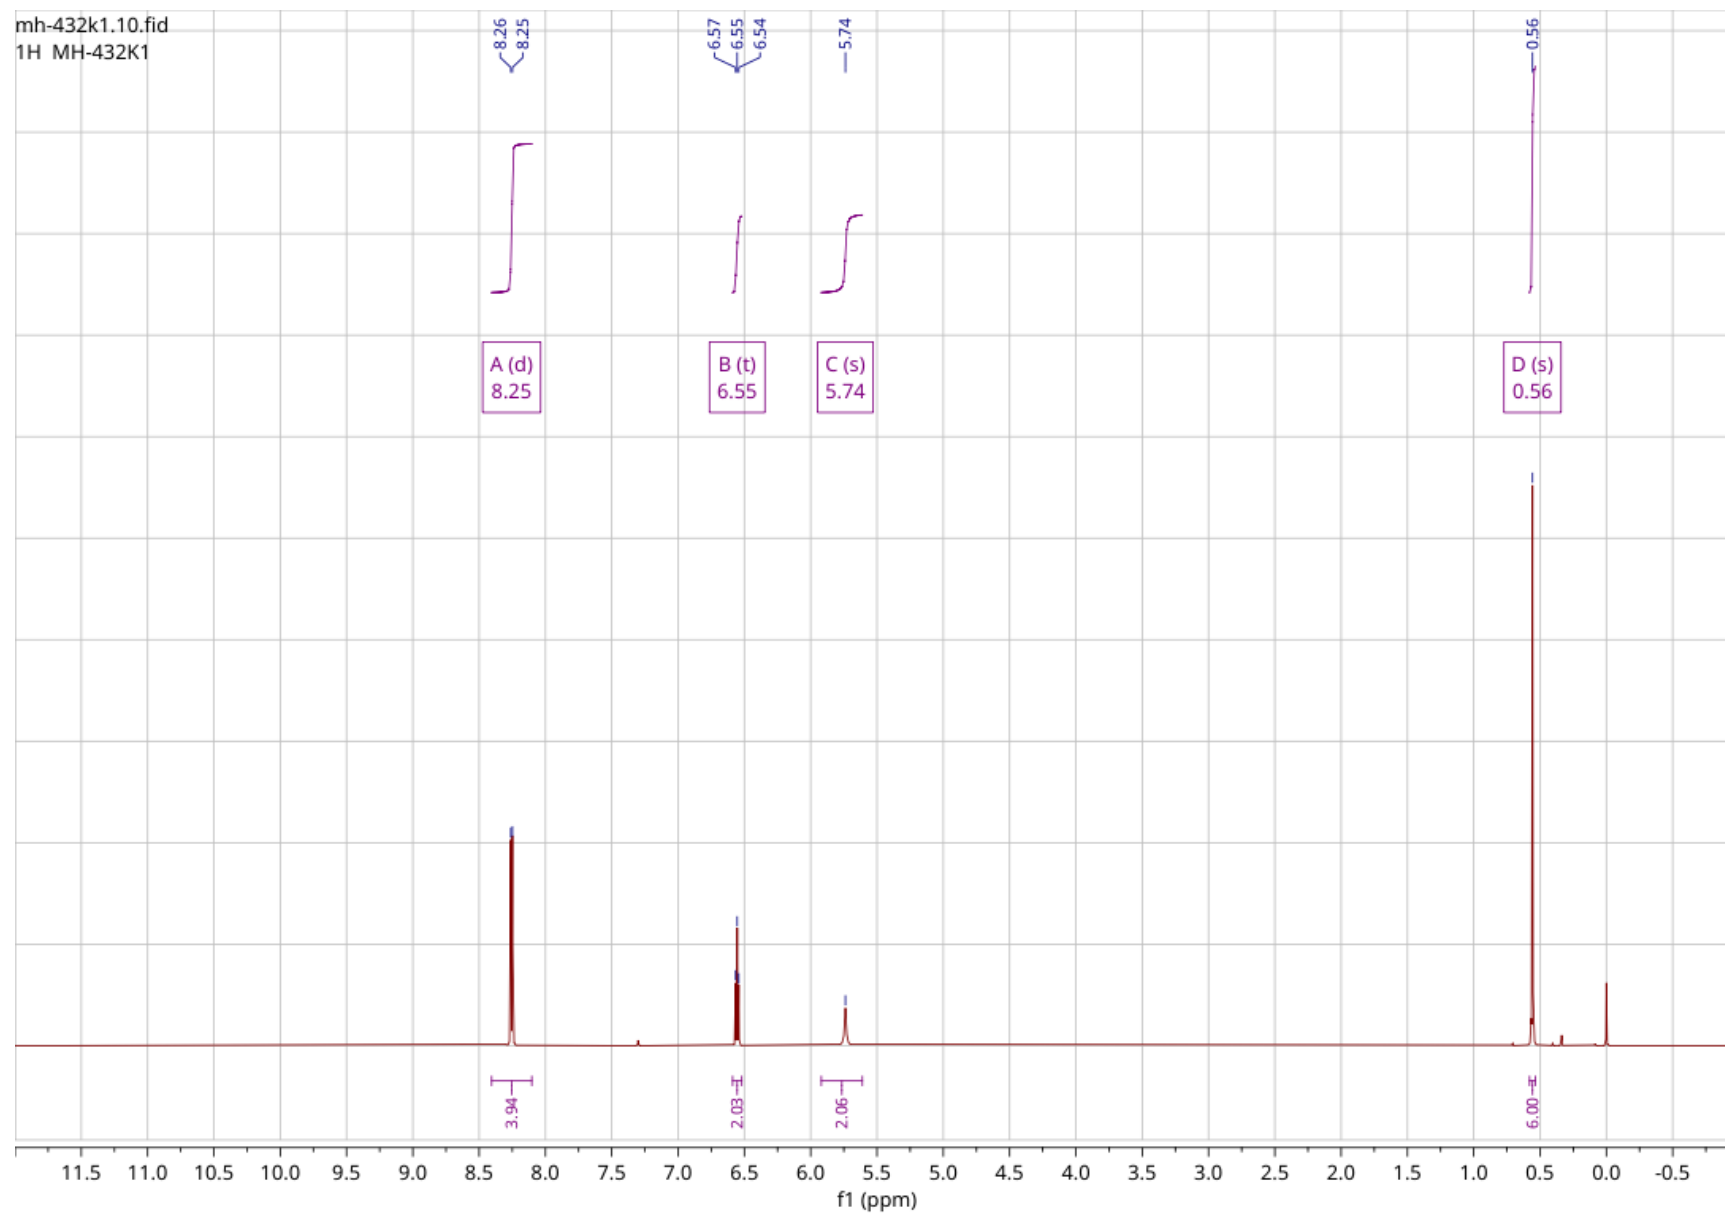

**Figure S4:**  $^1\text{H}$  NMR spectrum of **2** (in  $\text{CDCl}_3$ , with  $\text{SiMe}_4$  as internal shift reference).

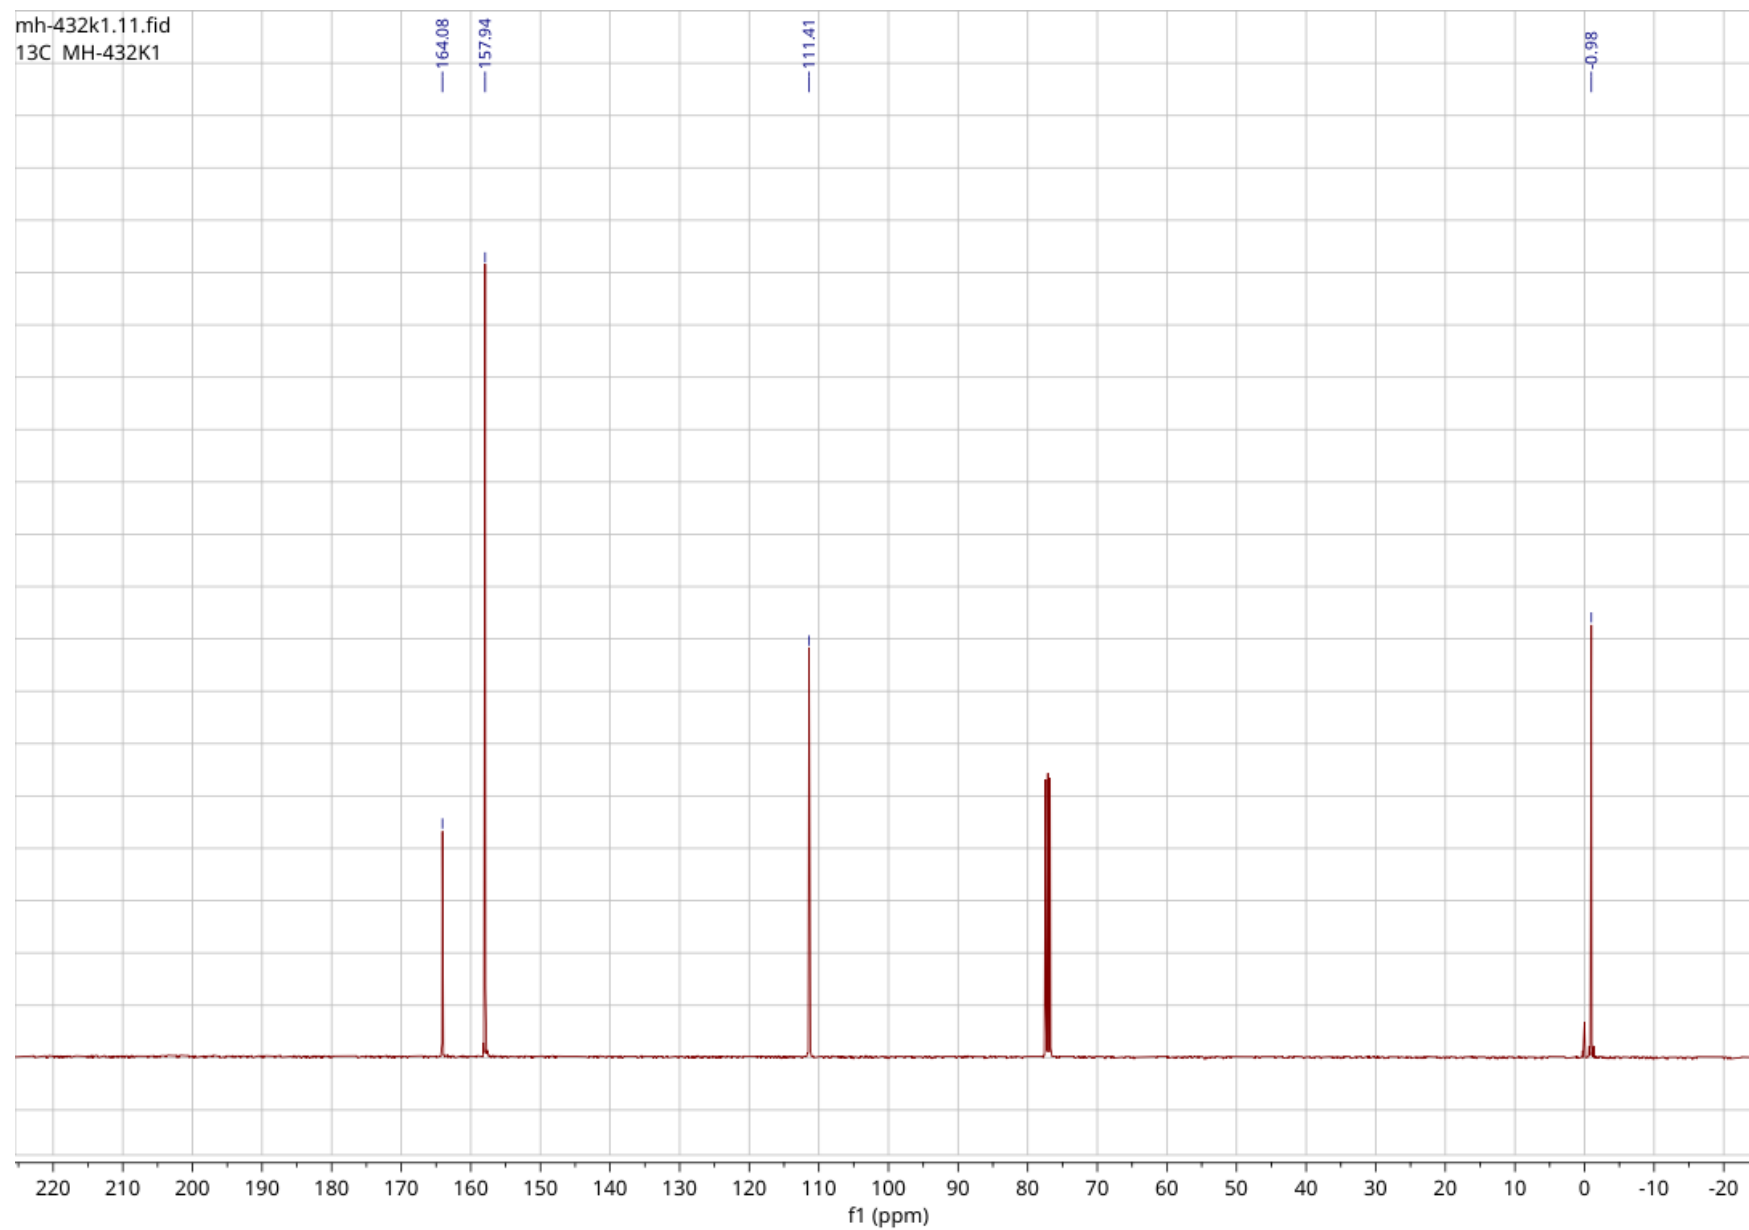

**Figure S5:**  $^{13}\text{C}\{^1\text{H}\}$  NMR spectrum of **2** (in  $\text{CDCl}_3$ , with  $\text{SiMe}_4$  as internal shift reference).

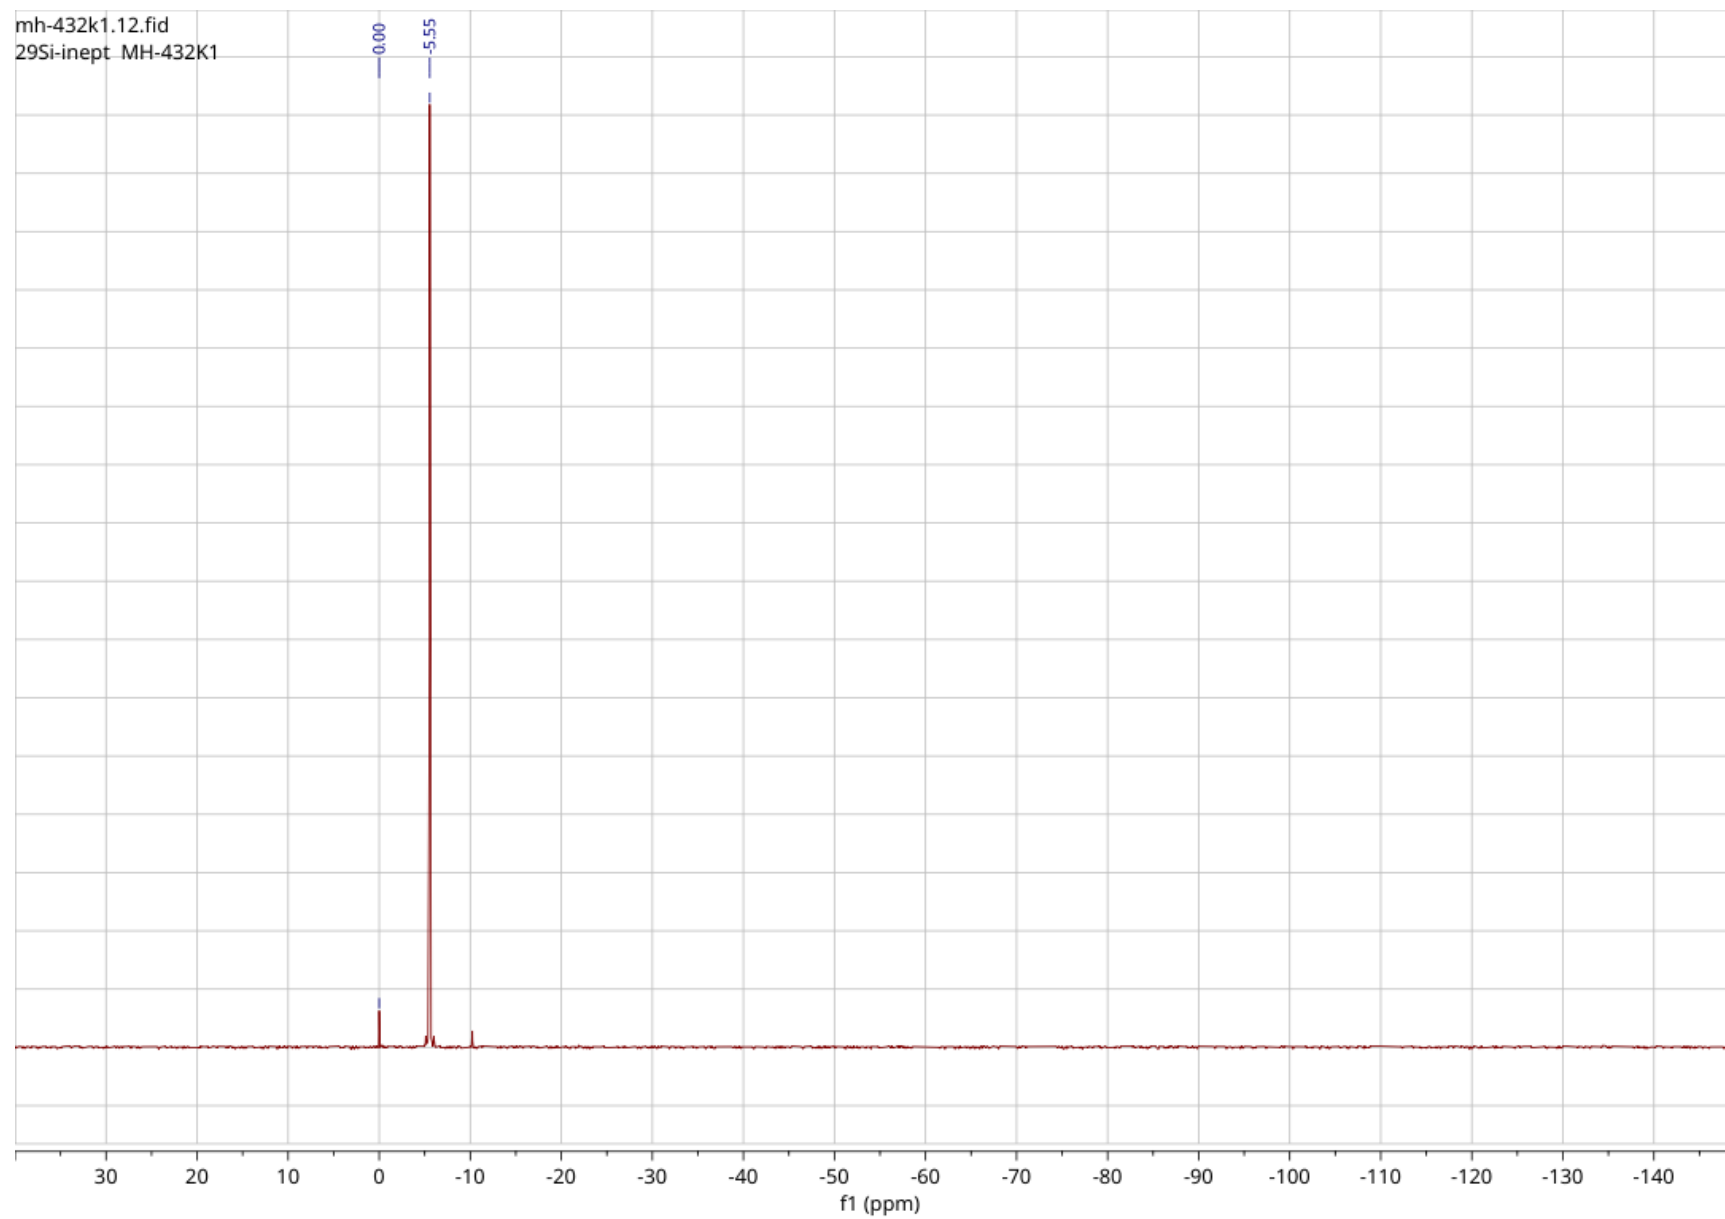

25

**Figure S6:**  $^{29}\text{Si}\{^1\text{H}\}$  INEPT NMR spectrum of **2** (in  $\text{CDCl}_3$ , with  $\text{SiMe}_4$  as internal shift reference).



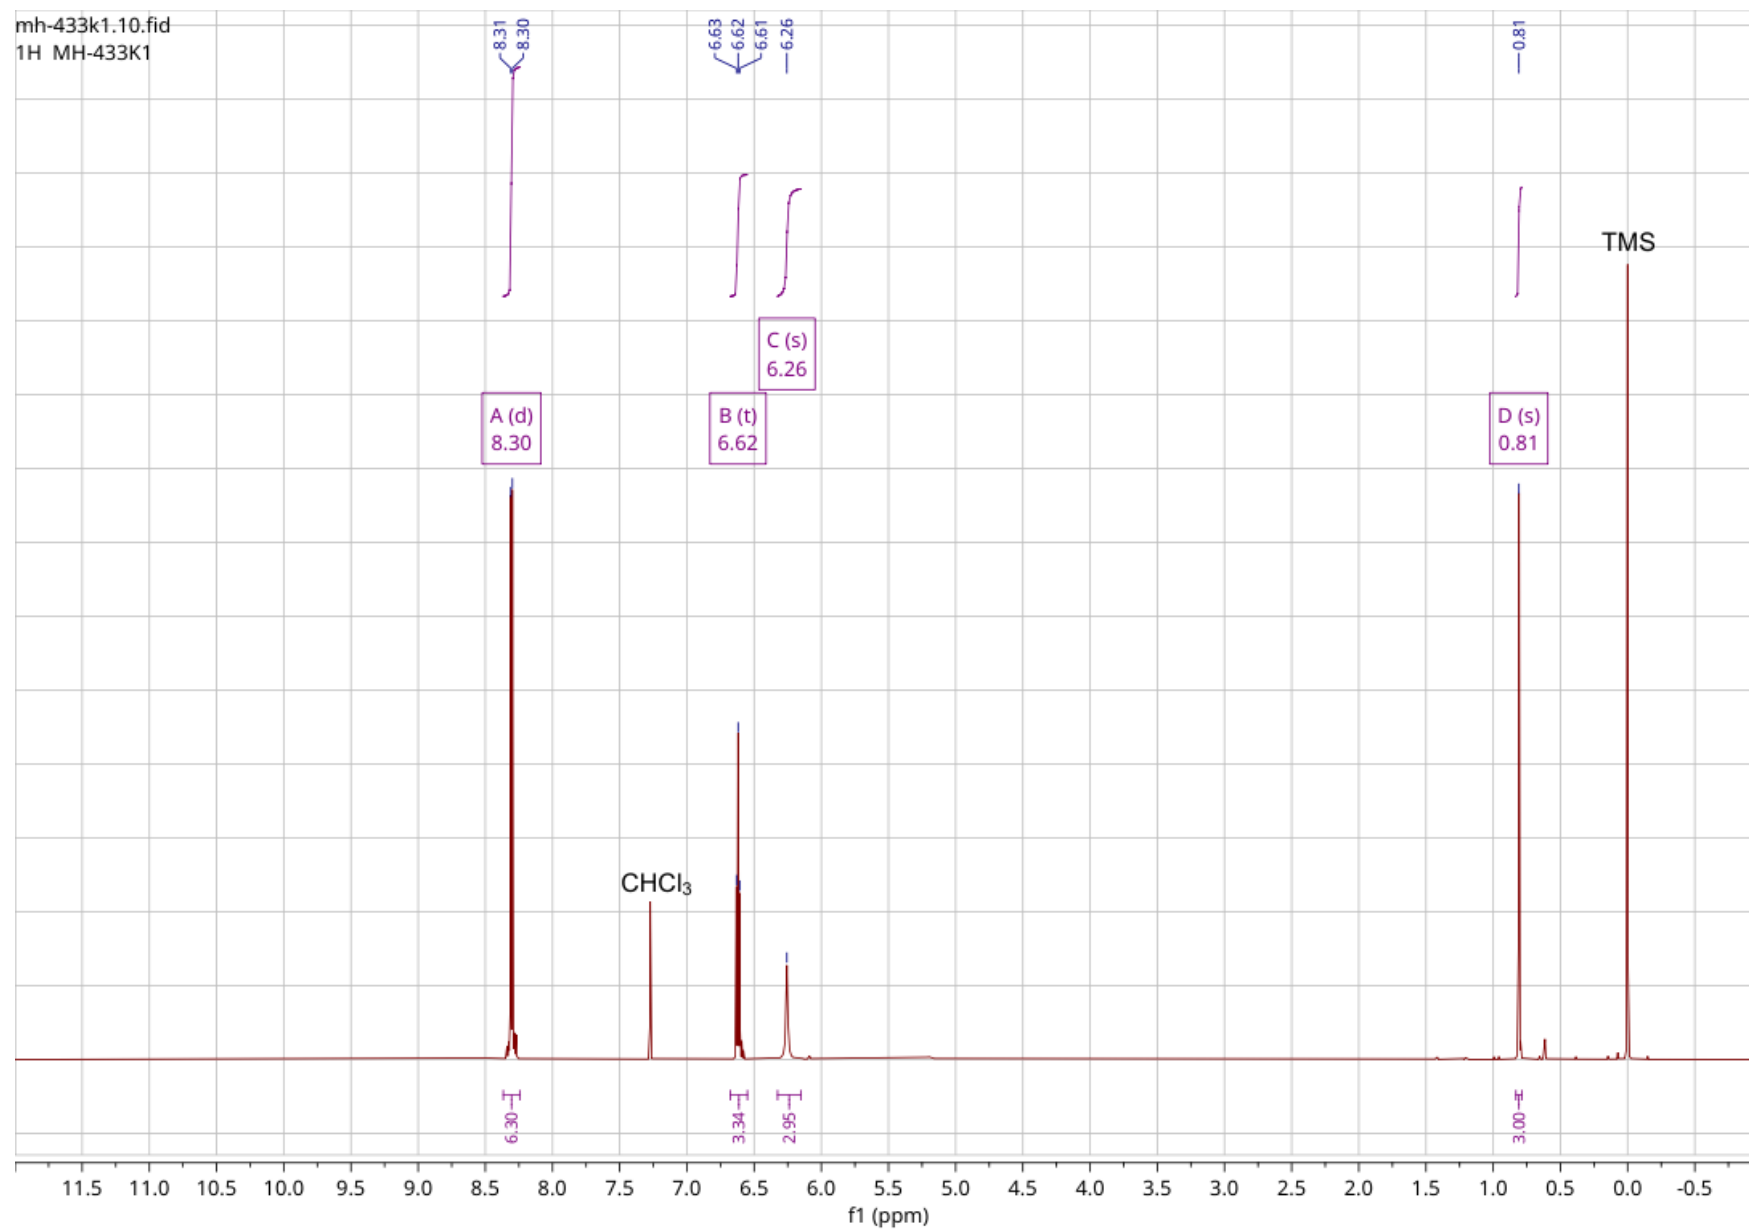

**Figure S7:** <sup>1</sup>H NMR spectrum of **3** (in CDCl<sub>3</sub>, with SiMe<sub>4</sub> as internal shift reference).

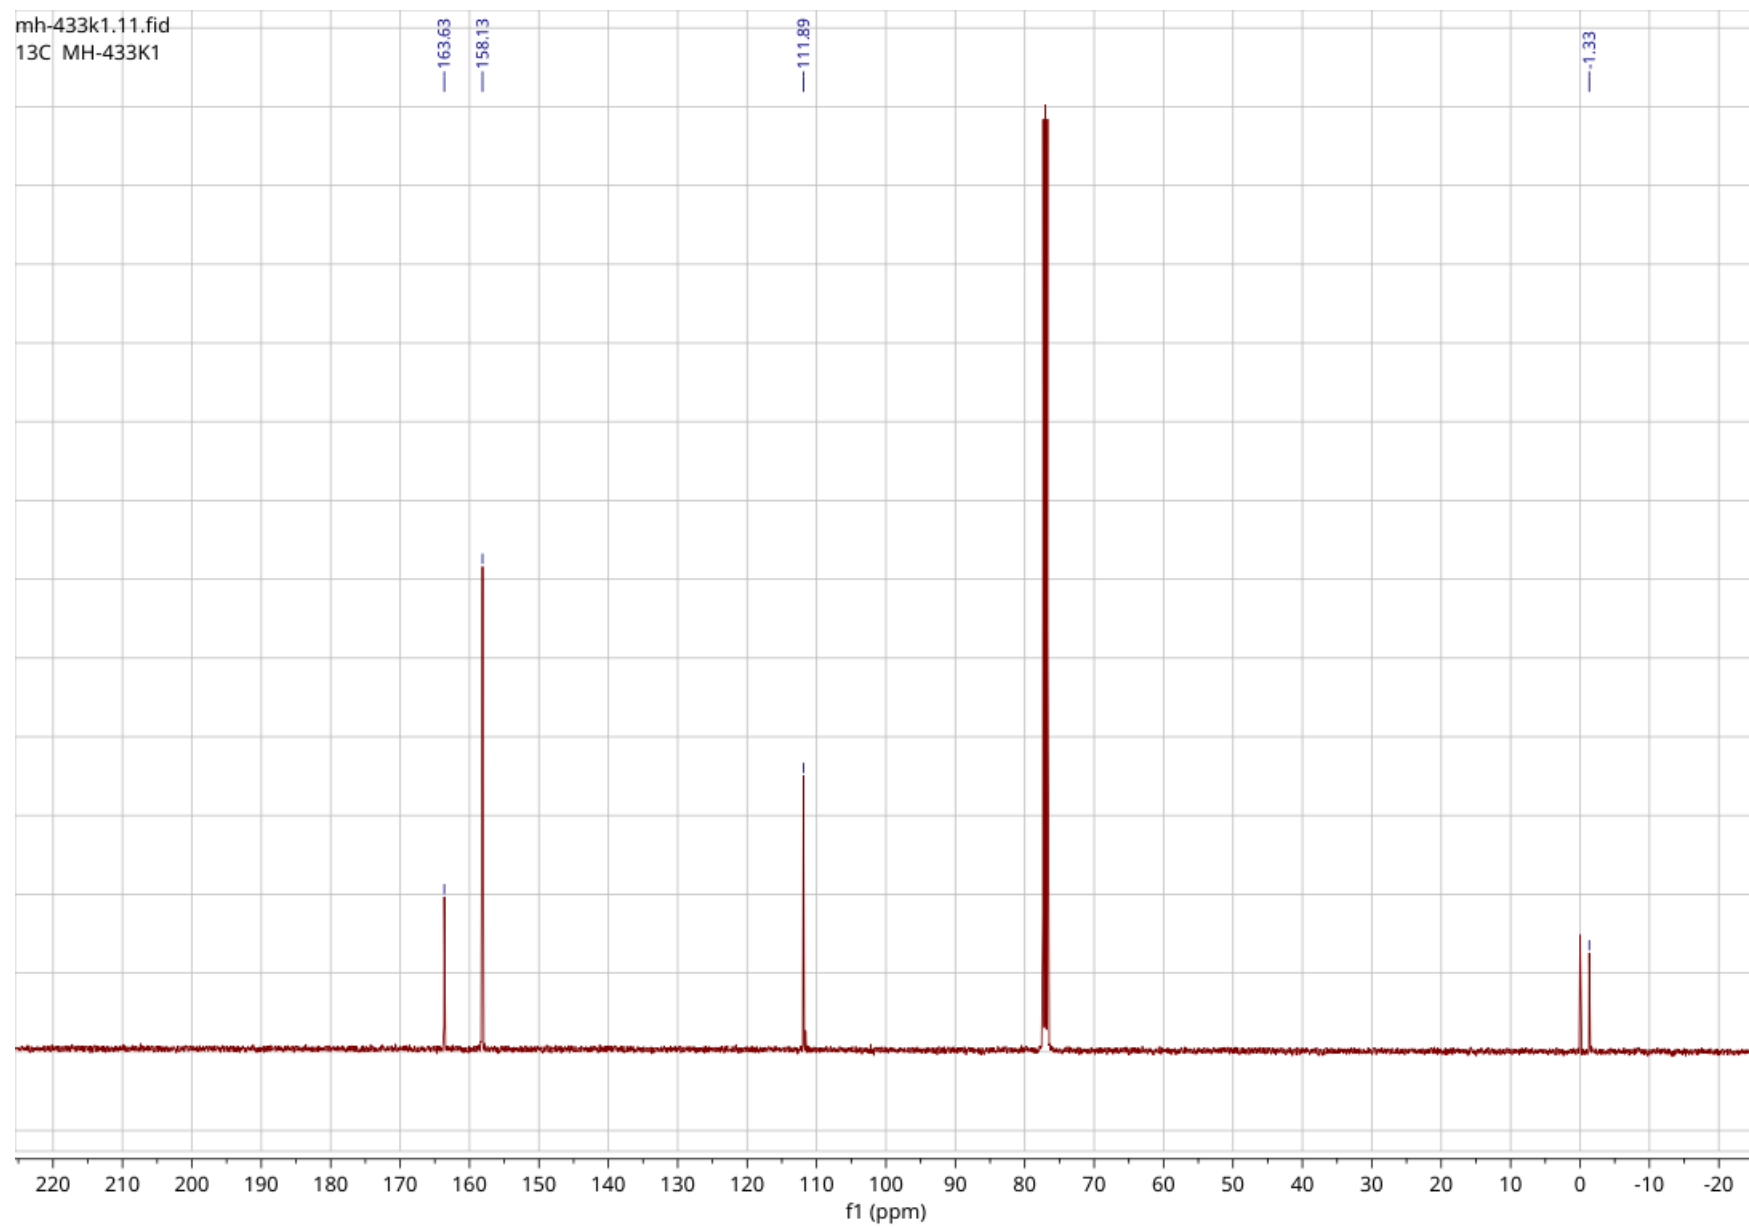

30 **Figure S8:**  $^{13}\text{C}\{^1\text{H}\}$  NMR spectrum of **3** (in  $\text{CDCl}_3$ , with  $\text{SiMe}_4$  as internal shift reference).

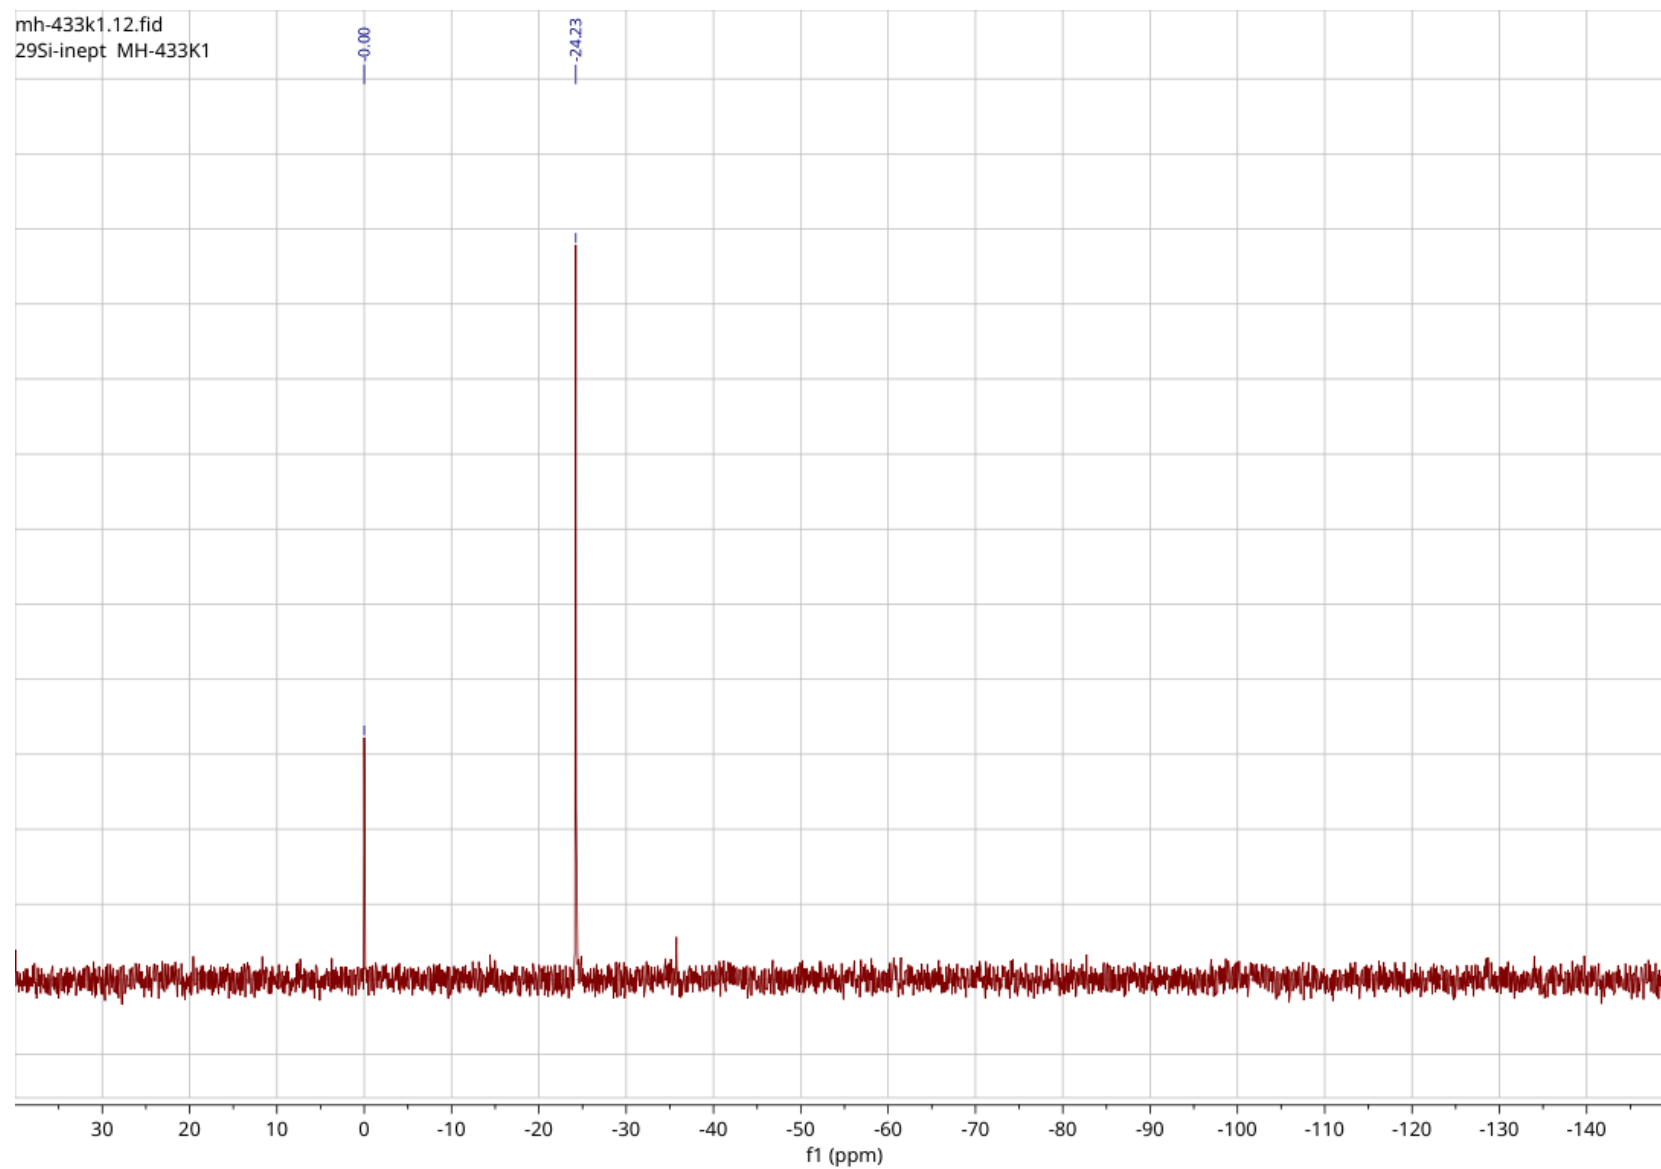

**Figure S9:**  $^{29}\text{Si}\{^1\text{H}\}$  INEPT NMR spectrum of **3** (in  $\text{CDCl}_3$ , with  $\text{SiMe}_4$  as internal shift reference).

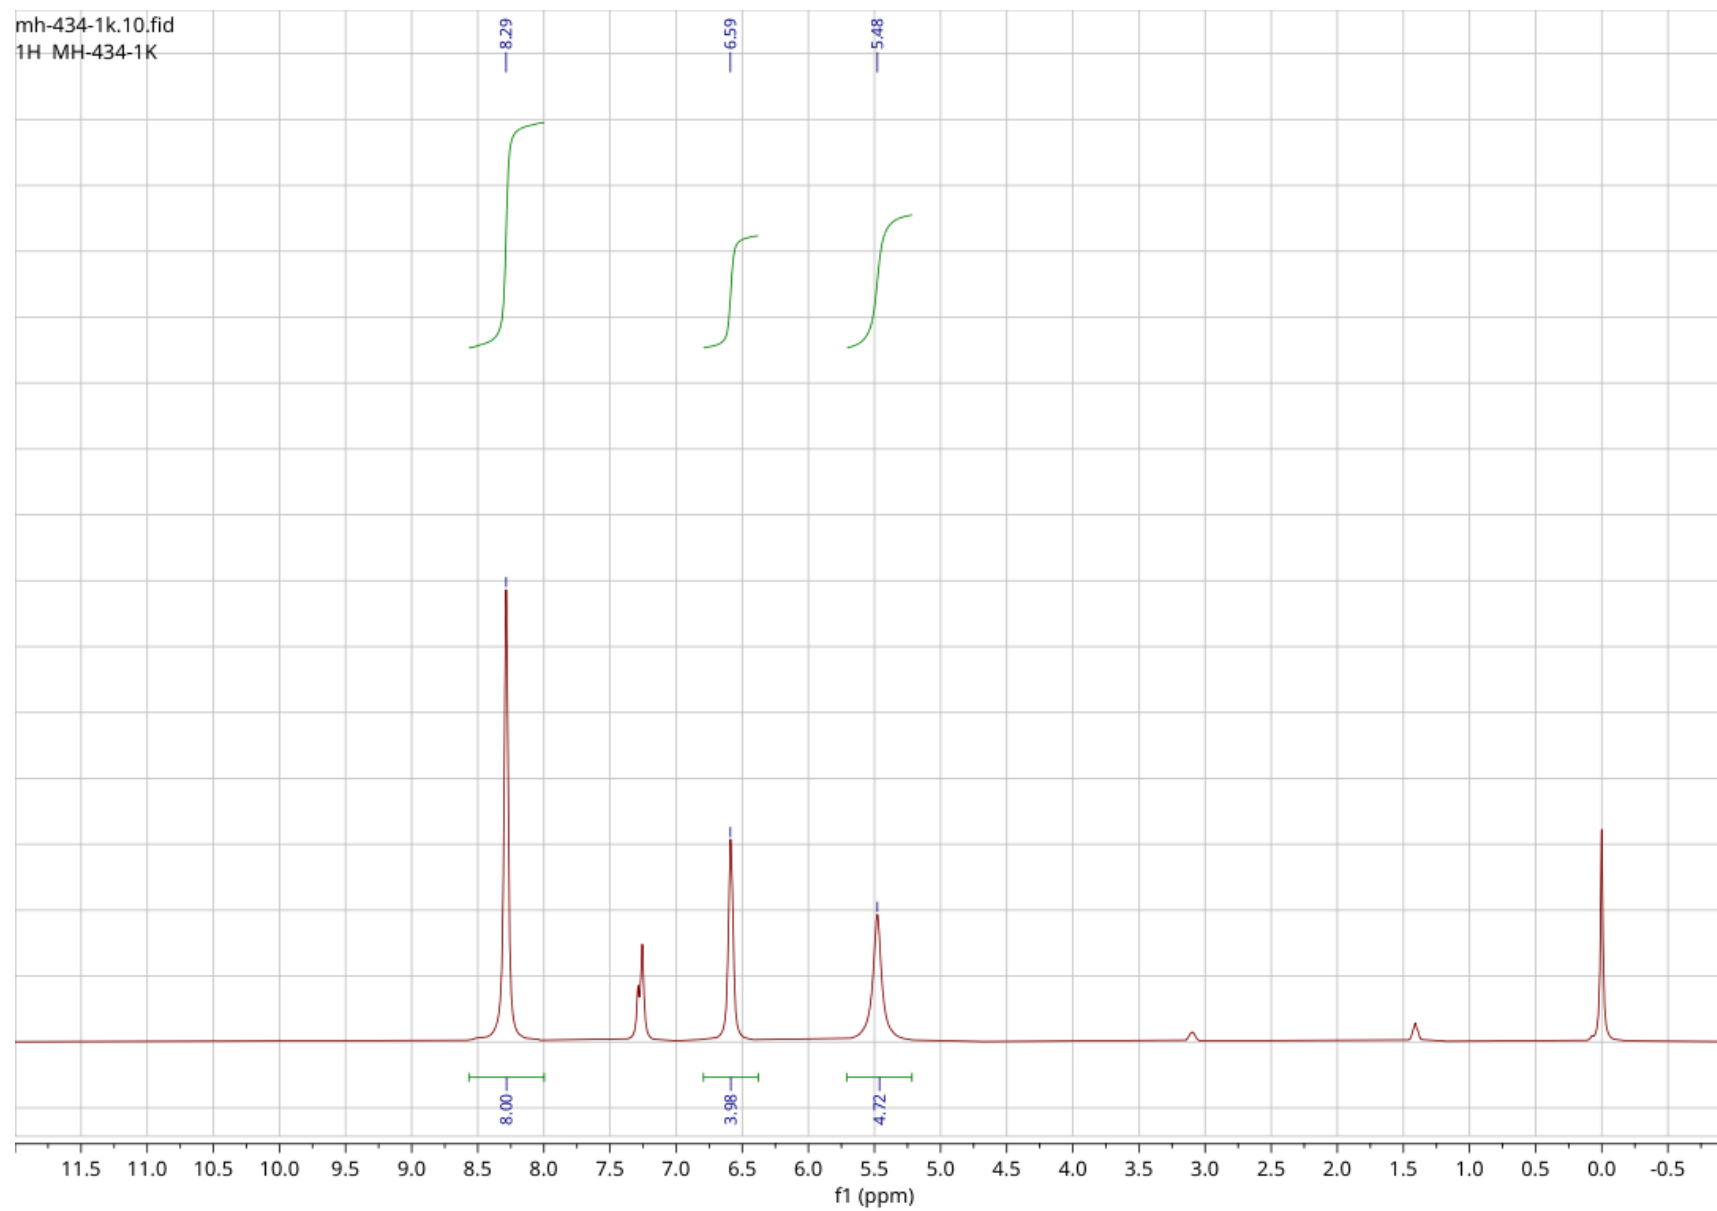

**Figure S10:**  $^1\text{H}$  NMR spectrum of **4** (in  $\text{CDCl}_3$ , with  $\text{SiMe}_4$  as internal shift reference).

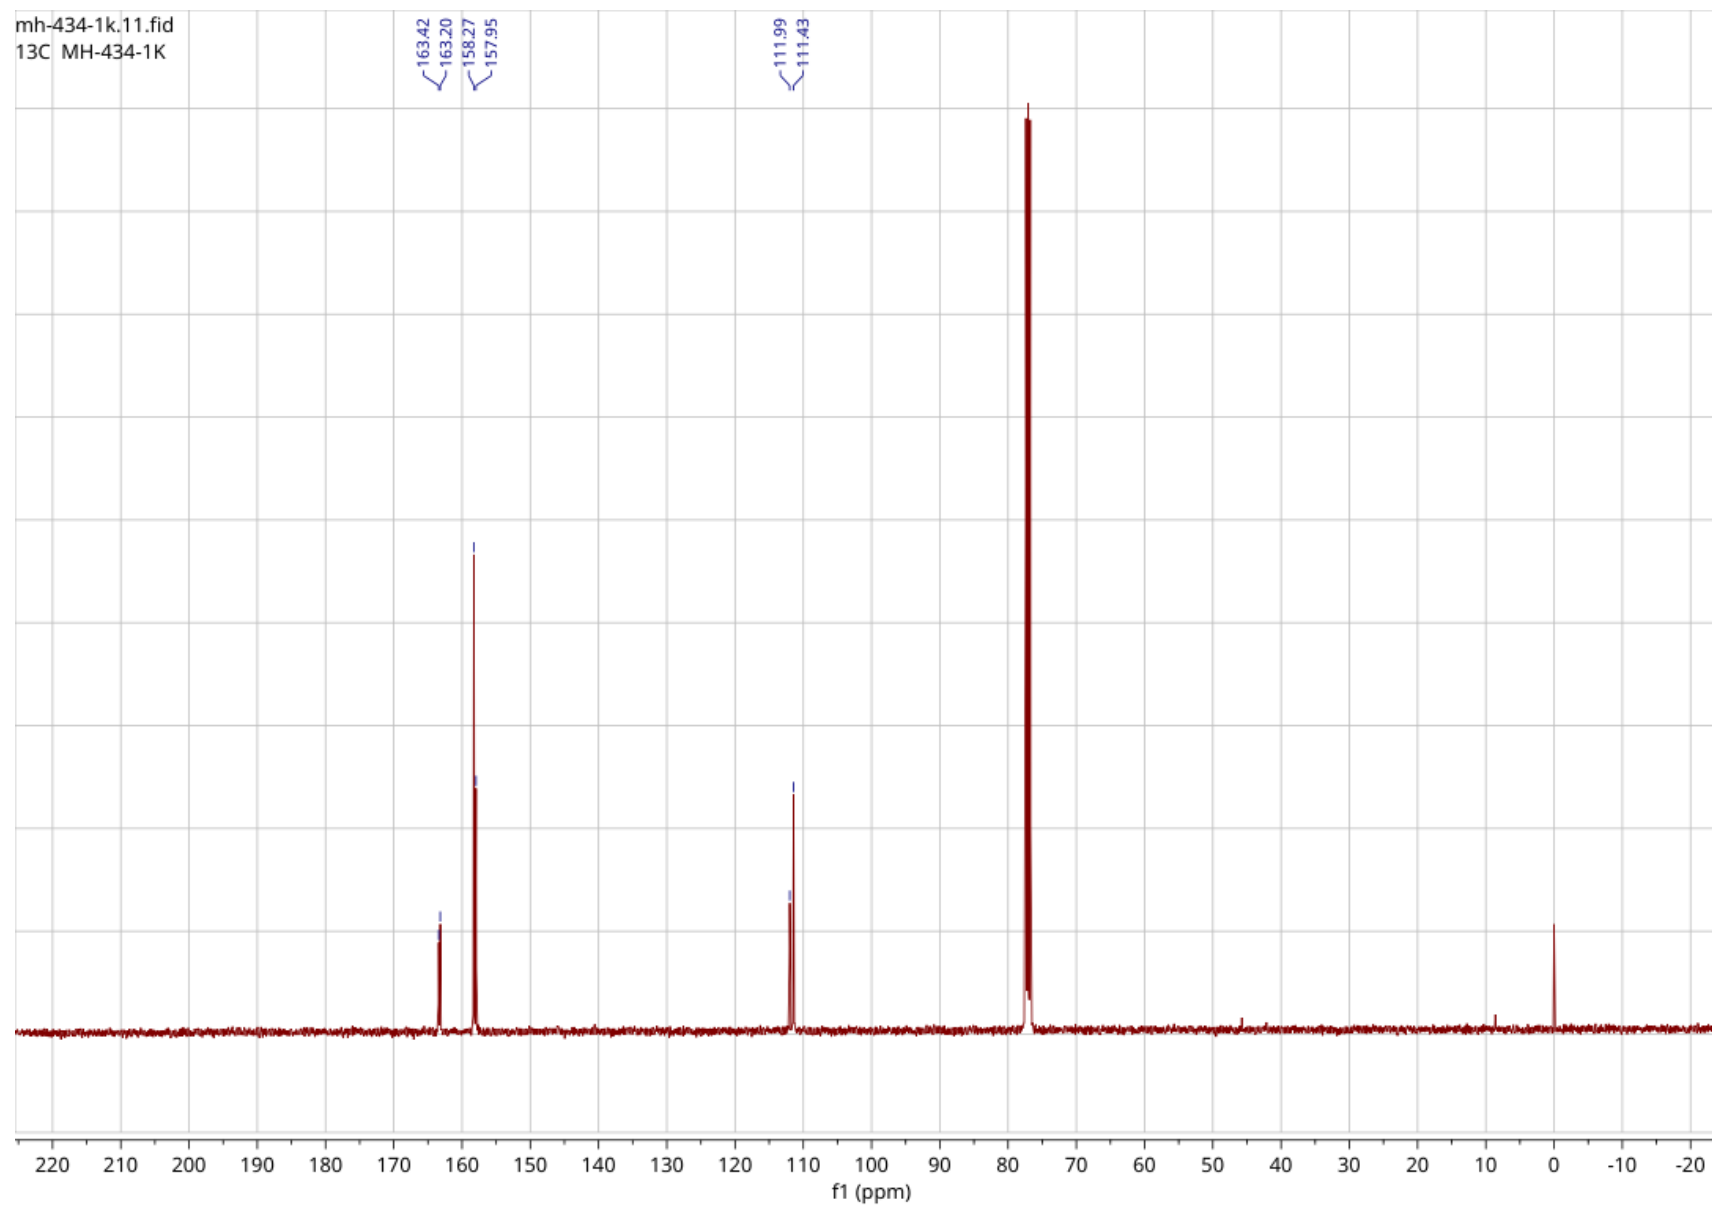

35

**Figure S11:**  $^{13}\text{C}\{^1\text{H}\}$  NMR spectrum of **4** (in  $\text{CDCl}_3$ , with  $\text{SiMe}_4$  as internal shift reference).

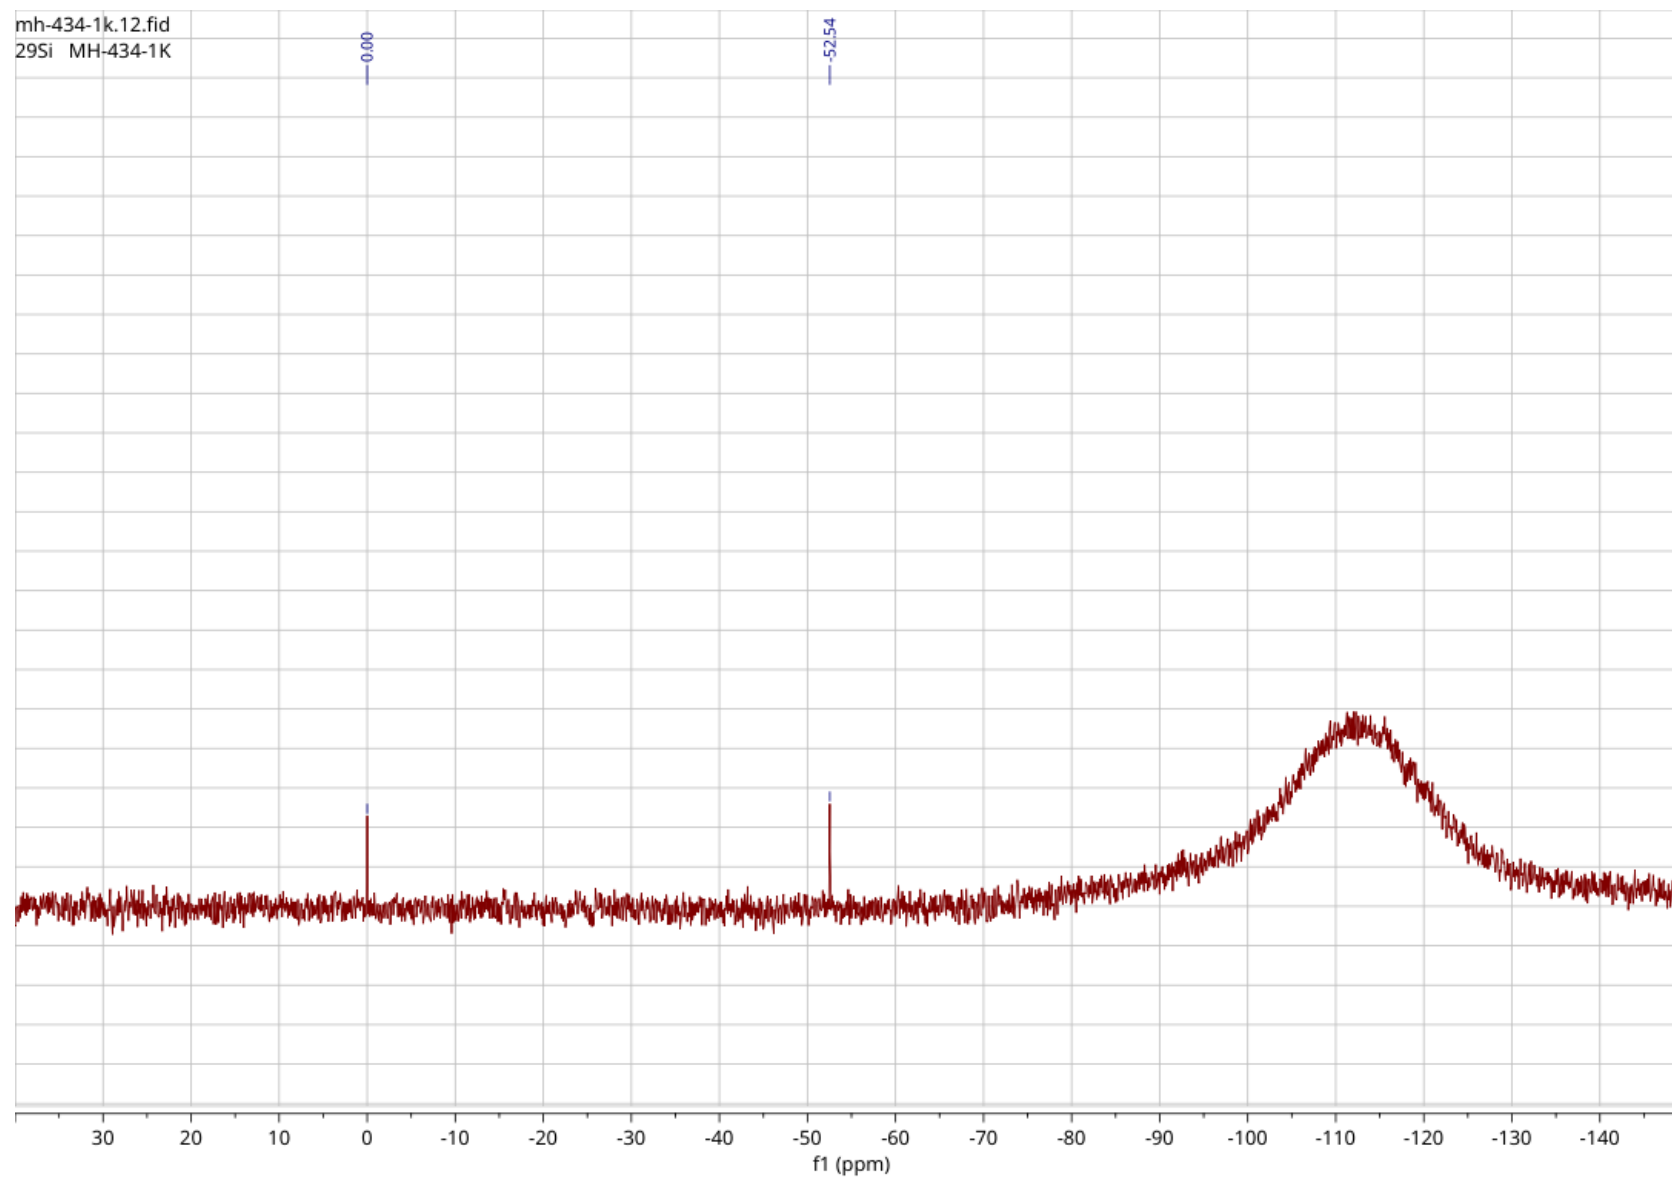

**Figure S12:**  $^{29}\text{Si}\{^1\text{H}\}$  NMR spectrum of **4** (in  $\text{CDCl}_3$ , with  $\text{SiMe}_4$  as internal shift reference).

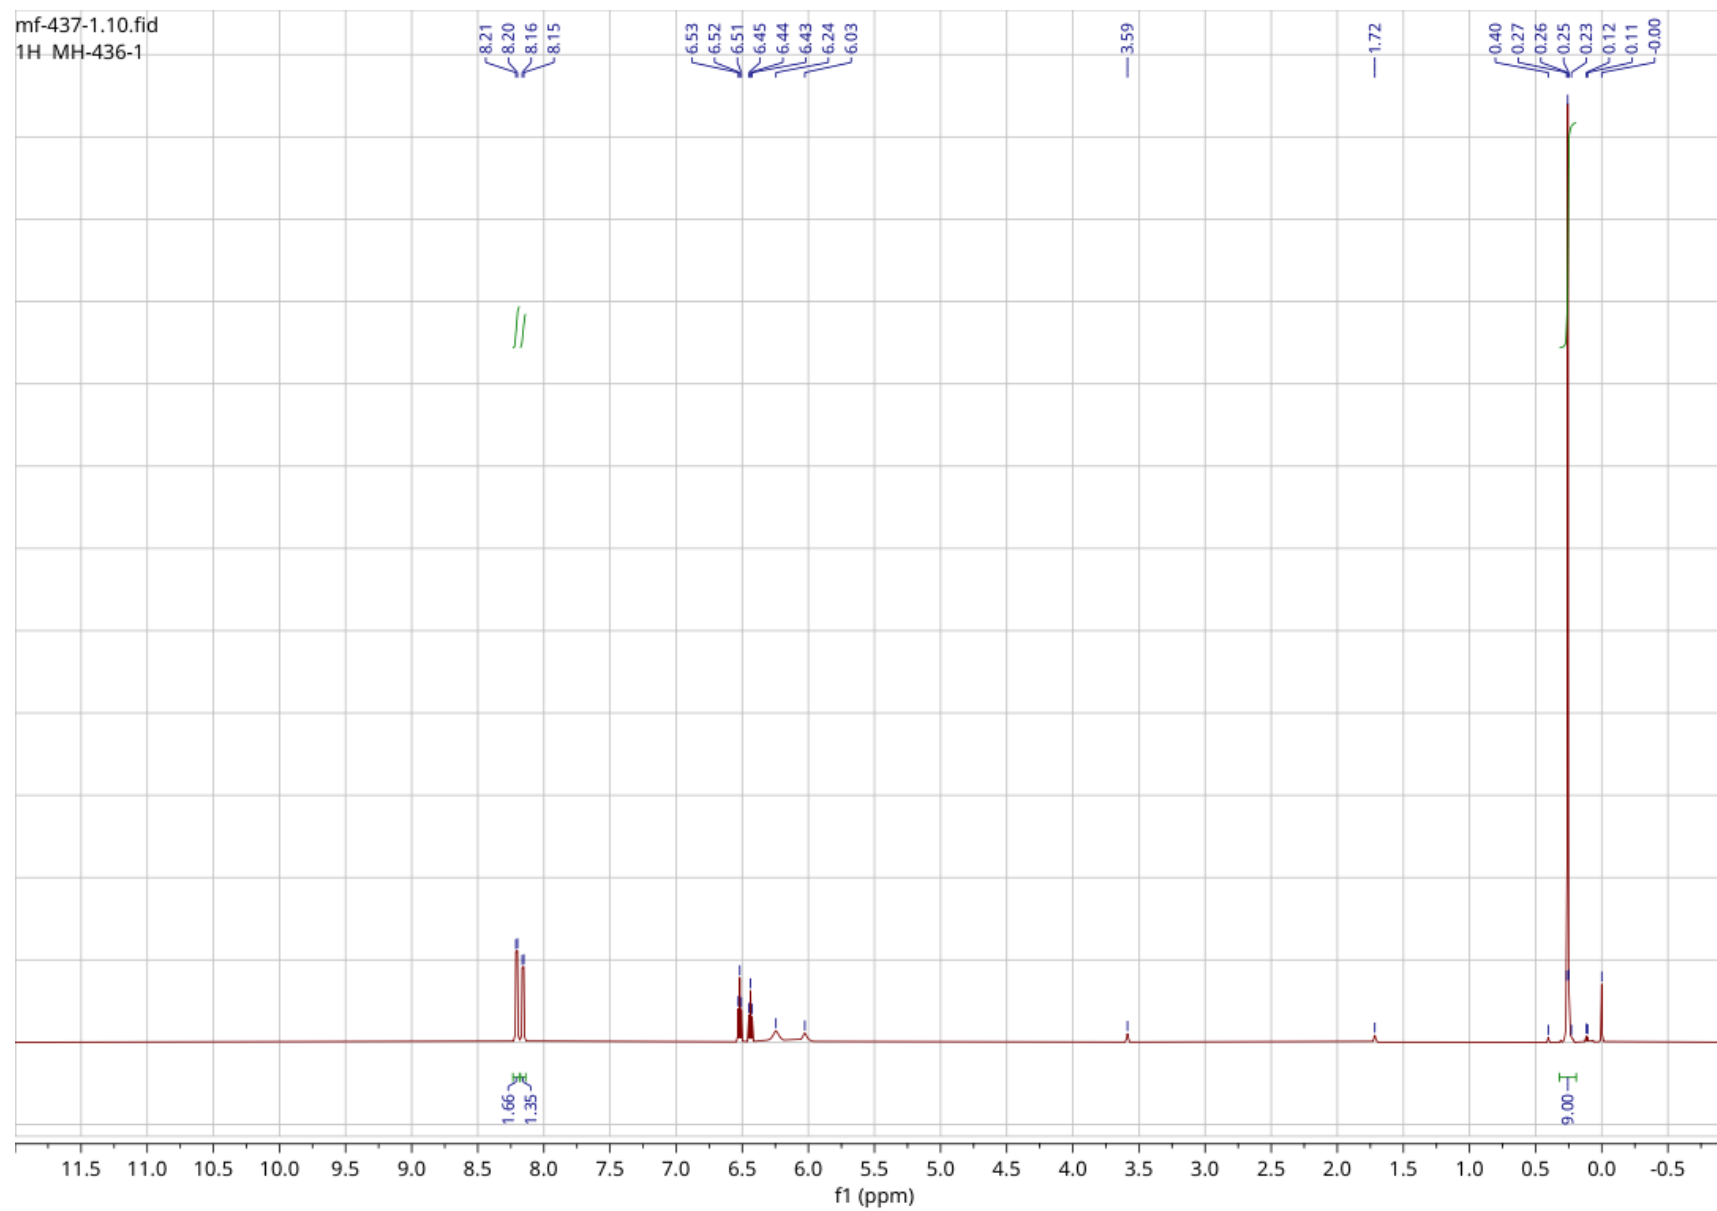

40 **Figure S13:**  $^1\text{H}$  NMR spectrum of **1** (containing 2-aminopyrimidine) in a solution with  $\text{CO}_2$  (in  $\text{THF-d}_8$ , with  $\text{SiMe}_4$  as internal shift reference).

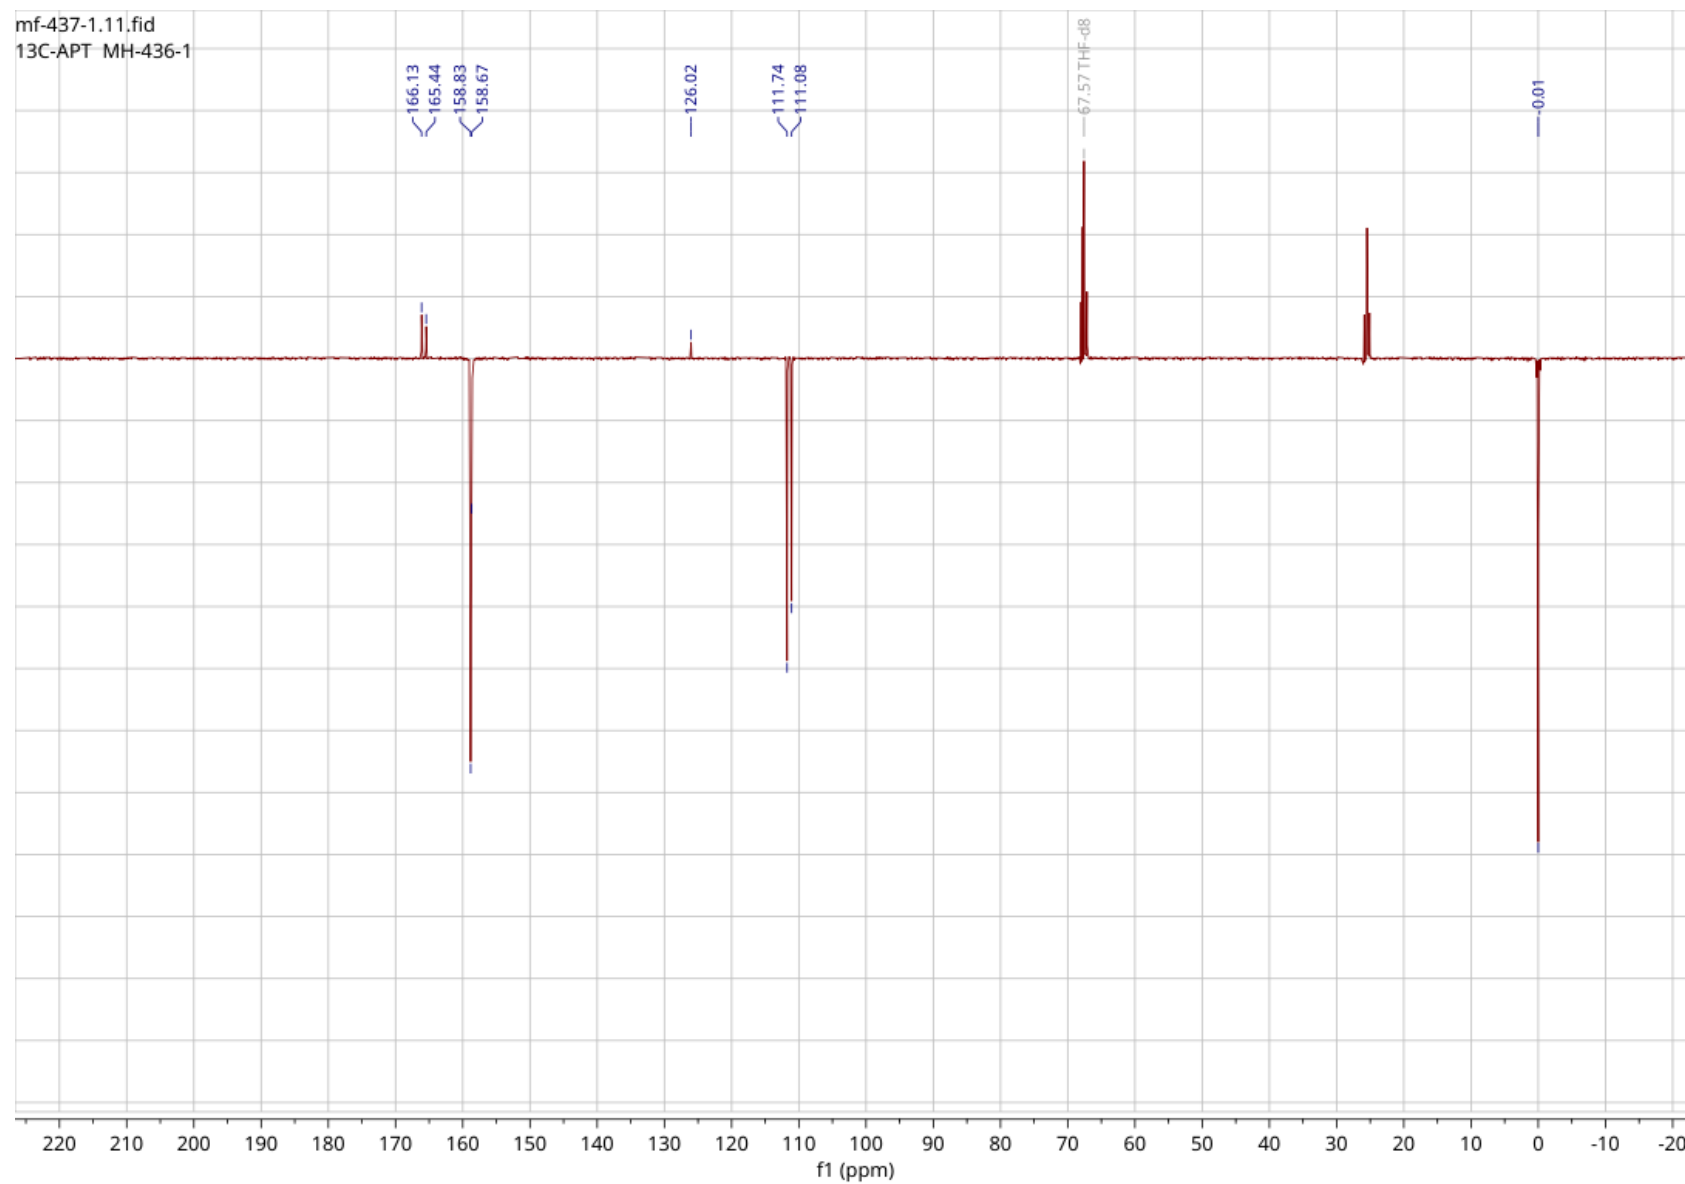

**Figure S14:**  $^{13}\text{C}\{^1\text{H}\}$  APT NMR spectrum of **1** (containing 2-aminopyrimidine) in a solution with  $\text{CO}_2$  (in  $\text{THF-d}_8$ , with  $\text{SiMe}_4$  as internal shift reference). The relaxation delay was set to 10 seconds to detect signals of carbonyl moieties.



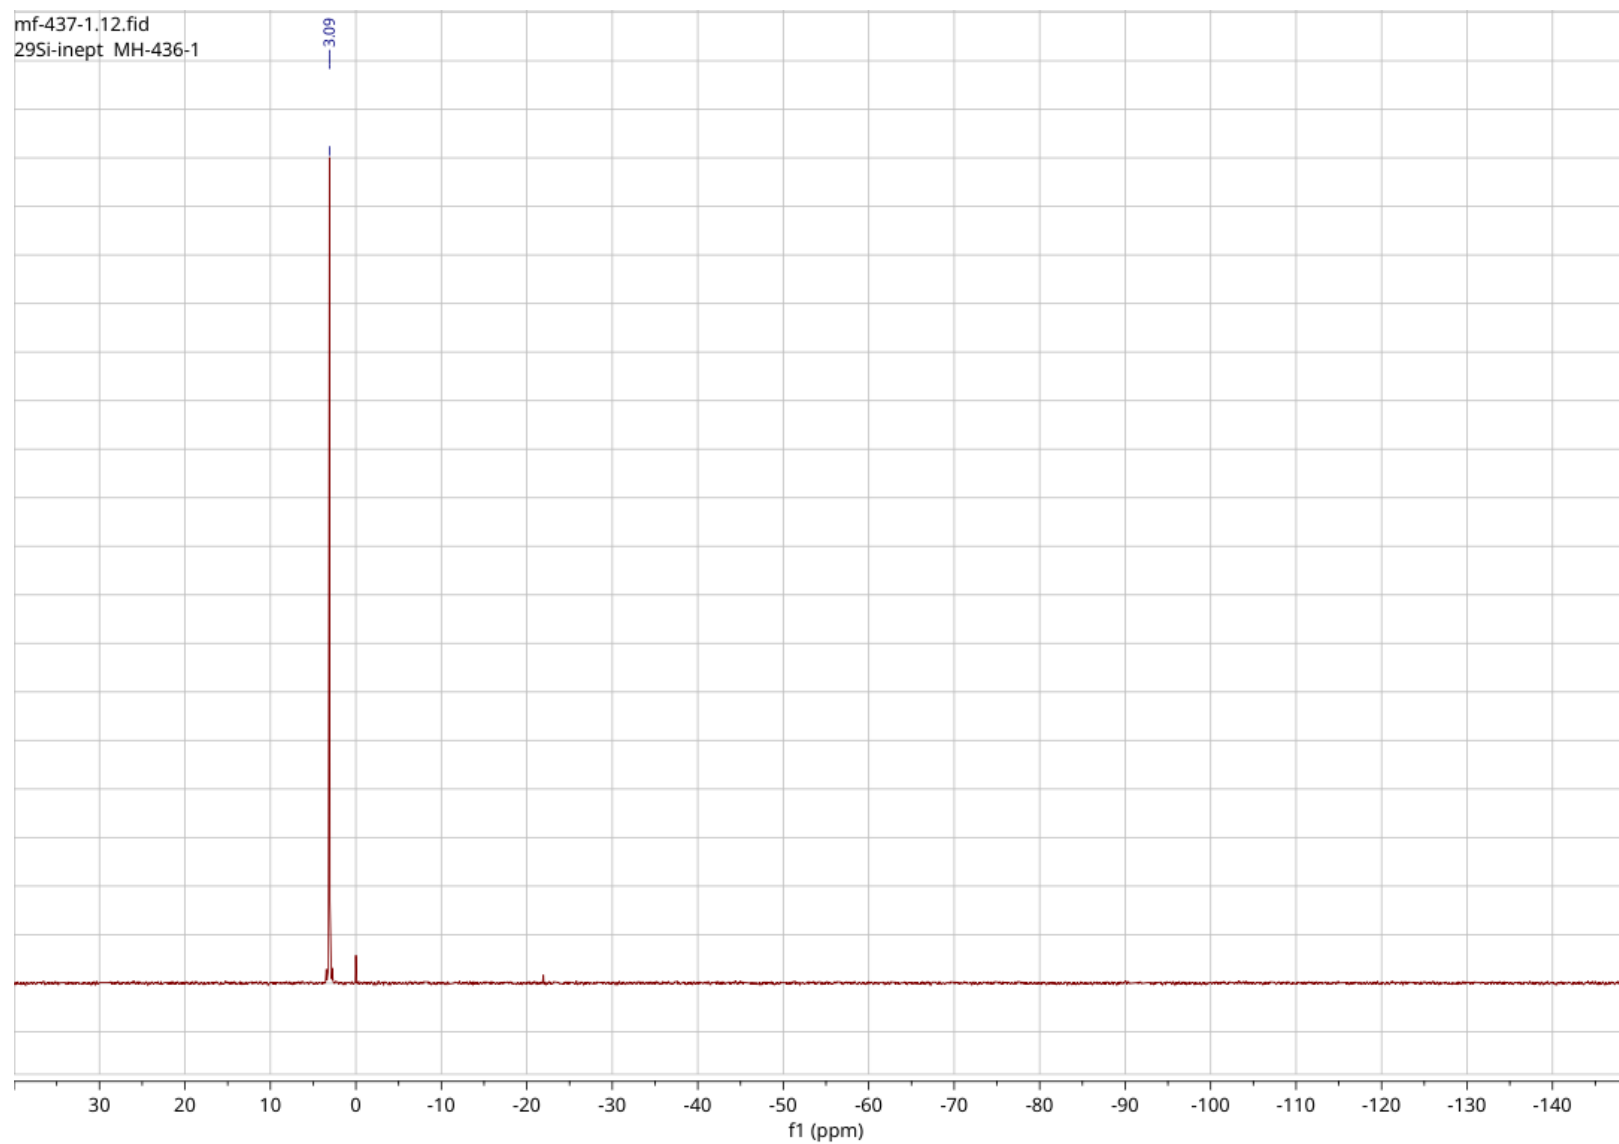

45 **Figure S15:**  $^{29}\text{Si}\{^1\text{H}\}$  INEPT NMR spectrum of **1** (containing 2-aminopyrimidine) in a solution with  $\text{CO}_2$  (in  $\text{THF-d}_8$ , with  $\text{SiMe}_4$  as internal shift reference).

**Table S2:** Representative parameters used in NMR data acquisition

| Spectrum              | $^1\text{H}$ | $^{13}\text{C}\{^1\text{H}\}$ | $^{13}\text{C}\{^1\text{H}\}$ APT | $^{29}\text{Si}\{^1\text{H}\}$ | $^{29}\text{Si}\{^1\text{H}\}$ INEPT |
|-----------------------|--------------|-------------------------------|-----------------------------------|--------------------------------|--------------------------------------|
| Pulse Sequence        | zg30         | zgpg30                        | jmod                              | zgig30                         | ineptrd-Si                           |
| Number of Scans       | 8            | 400                           | 208                               | 800                            | 56                                   |
| Receiver Gain         | 109.0        | 204.7                         | 204.7                             | 204.7                          | 204.7                                |
| Relaxation Delay [s]  | 1.0          | 10.0                          | 10.0                              | 30.0                           | 5.0                                  |
| Pulse Width           | 13.80        | 8.70                          | 8.79                              | 9.30                           | 9.30                                 |
| Acquisition Time [s]  | 4.0894       | 1.9038                        | 1.9999                            | 1.9999                         | 1.9999                               |
| Frequency [MHz]       | 400.13       | 100.62                        | 100.62                            | 79.49                          | 79.49                                |
| Spectral Width [Hz]   | 8012.8       | 25252.5                       | 25252.5                           | 32051.3                        | 23809.5                              |
| Lowest Frequency [Hz] | -1540.3      | -2565.5                       | -2573.0                           | -23949.6                       | -19837.4                             |
| Acquired Size         | 32768        | 48075                         | 50503                             | 64100                          | 47617                                |
| Spectral Size         | 65536        | 131072                        | 131072                            | 131072                         | 131072                               |

### 3 Raman spectra

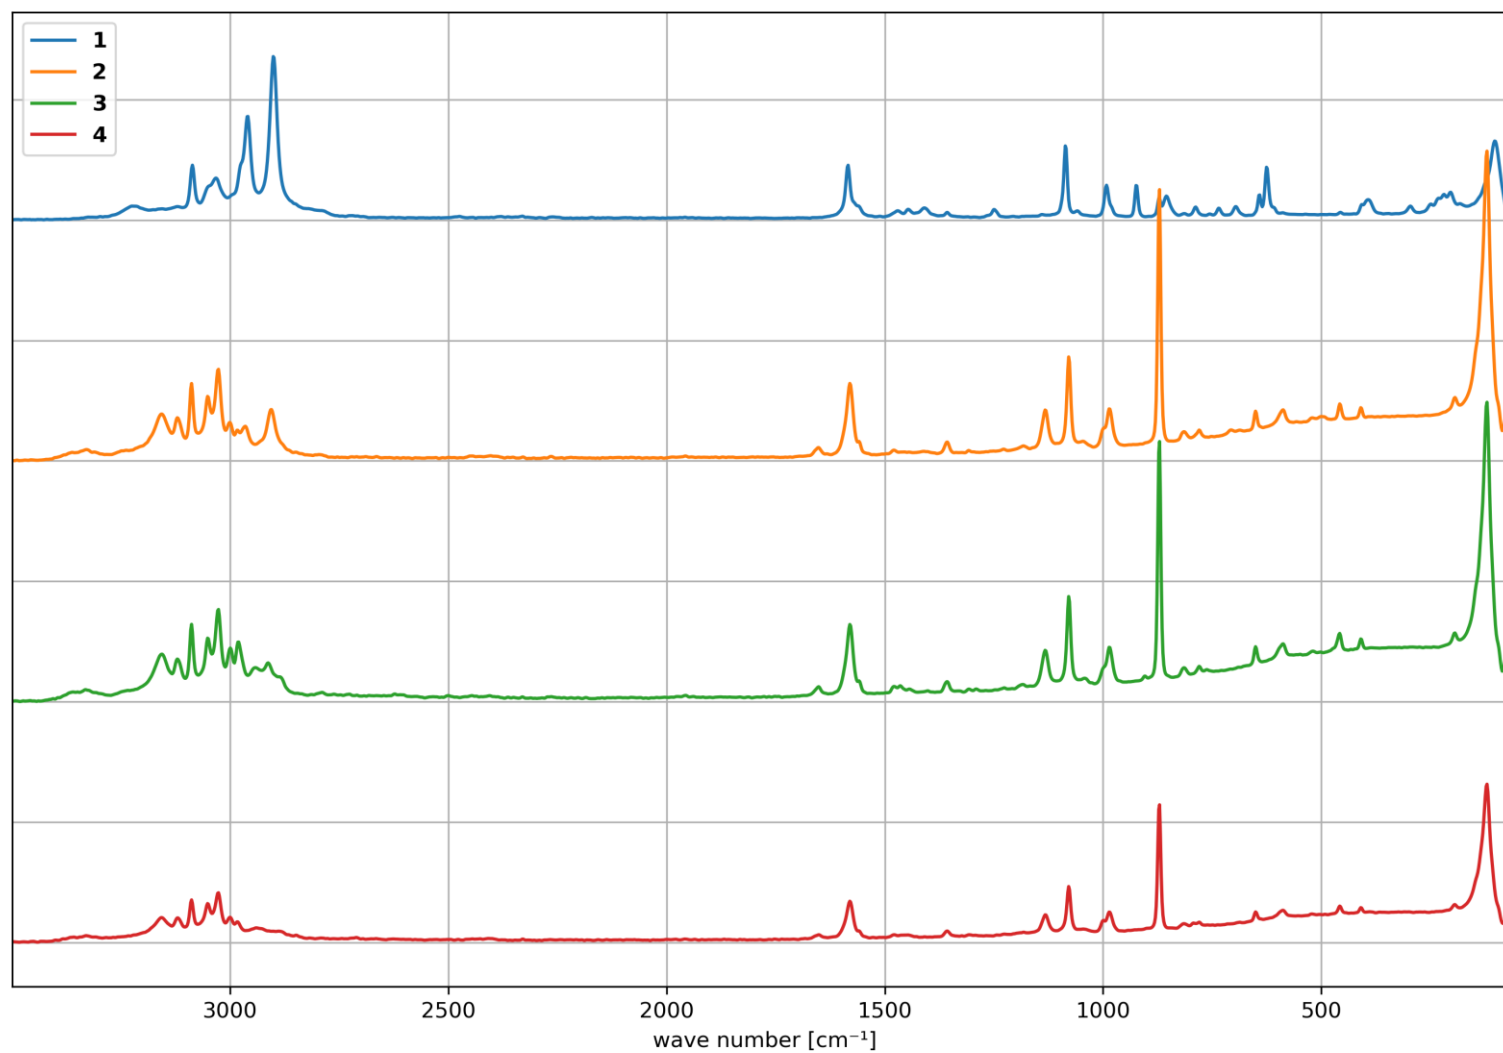

**Figure S16:** Raman spectra of compounds **1** – **4**.
